# Supplementary material for: Phylogenetic Position of Aquificales Based on the Whole Genome Sequences of Six Aquificales Species
Source: PubMed Central journal article supplement (PMC3403428; doi:10.1155/2012/859264), 2012-07-12
Supplement: 859264.f1.pdf [file 859264.f1.pdf]

### Supplementary Table 1

List of 62 proteins to construct the phylogenetic tree based on 18 whole genomes (Fig. 2).

| Accession number | Putative function                                      |
|------------------|--------------------------------------------------------|
| YP_003431711.1   | phenylalanyl-tRNA synthetase beta chain                |
| YP_003431775.1   | 3-phosphoglycerate kinase                              |
| YP_003431873.1   | 2-C-methyl-D-erythritol 4-phosphate cytidyltransferase |
| YP_003431886.1   | pseudouridylate synthase                               |
| YP_003431889.1   | signal recognition particle GTPase                     |
| YP_003431930.1   | acetyl-CoA carboxylase alpha subunit                   |
| YP_003431961.1   | valyl-tRNA synthetase                                  |
| YP_003431972.1   | GTP-binding protein                                    |
| YP_003431987.1   | inosine-5'-monophosphate dehydrogenase                 |
| YP_003432020.1   | aspartyl-tRNA synthetase                               |
| YP_003432036.1   | riboflavin synthase alpha chain                        |
| YP_003432147.1   | histidyl-tRNA synthetase                               |
| YP_003432239.1   | ribosomal protein S9                                   |
| YP_003432240.1   | ribosomal protein L13                                  |
| YP_003432274.1   | triosephosphate isomerase                              |
| YP_003432291.1   | methylenetetrahydrofolate dehydrogenase                |
| YP_003432353.1   | uridylate kinase                                       |
| YP_003432354.1   | translation elongation factor Ts                       |
| YP_003432355.1   | ribosomal protein S2                                   |
| YP_003432373.1   | ribosomal protein L14                                  |
| YP_003432375.1   | ribosomal protein L5                                   |
| YP_003432377.1   | ribosomal protein S8                                   |
| YP_003432378.1   | ribosomal protein L6                                   |
| YP_003432380.1   | ribosomal protein S5                                   |
| YP_003432382.1   | ribosomal protein L15                                  |
| YP_003432383.1   | preprotein translocase SecY subunit                    |
| YP_003432384.1   | adenylate kinase                                       |
| YP_003432388.1   | ribosomal protein S13                                  |
| YP_003432389.1   | ribosomal protein S11                                  |
| YP_003432390.1   | ribosomal protein S4                                   |
| YP_003432406.1   | dimethyladenosine transferase                          |

---

|                |                                            |
|----------------|--------------------------------------------|
| YP_003432408.1 | methionyl-tRNA synthetase                  |
| YP_003432503.1 | ribosomal protein S17                      |
| YP_003432506.1 | ribosomal protein S3                       |
| YP_003432507.1 | ribosomal protein L22                      |
| YP_003432508.1 | ribosomal protein S19                      |
| YP_003432509.1 | ribosomal protein L2                       |
| YP_003432512.1 | ribosomal protein L3                       |
| YP_003432513.1 | ribosomal protein S10                      |
| YP_003432518.1 | DNA-directed RNA polymerase beta' subunit  |
| YP_003432522.1 | ribosomal protein L1                       |
| YP_003432523.1 | ribosomal protein L11                      |
| YP_003432624.1 | dephospho-CoA kinase                       |
| YP_003432637.1 | enolase                                    |
| YP_003432711.1 | cysteinyl-tRNA synthetase                  |
| YP_003432747.1 | leucyl-tRNA synthetase                     |
| YP_003432831.1 | polyribonucleotide nucleotidyltransferase  |
| YP_003432832.1 | ribosomal protein S15                      |
| YP_003432924.1 | translation initiation factor IF-2         |
| YP_003432953.1 | queuine tRNA-ribosyltransferase            |
| YP_003432968.1 | GMP synthase                               |
| YP_003433016.1 | O-sialoglycoprotein endopeptidase          |
| YP_003433062.1 | signal recognition particle                |
| YP_003433099.1 | ribonuclease HII                           |
| YP_003433106.1 | CTP synthetase                             |
| YP_003433243.1 | seryl-tRNA synthetase                      |
| YP_003433320.1 | thymidylate kinase                         |
| YP_003433334.1 | phenylalanyl-tRNA synthetase alpha subunit |
| YP_003433441.1 | undecaprenyl pyrophosphate synthetase      |
| YP_003433497.1 | alanyl-tRNA synthetase                     |
| YP_003433542.1 | arginyl-tRNA synthetase                    |
| YP_003433549.1 | cell cycle protein                         |

---
